# Supplementary material for: S-Trap eliminates cell culture media polymeric surfactants for effective proteomic analysis of mammalian cell bioreactor supernatants
Source: bioRxiv or medRxiv preprint supplement (doi:10.1101/2020.02.17.951798), 2020-03-18
Supplement: Supplementary file [file media-5.pdf]

# Supplementary Table S4

Summary of experimental details for each of the comparisons presented in this work

| Figure | Biological samples compared                                                                                                                   | Replicates             | Method and lysis buffer                                                                                                                                                                                                                                                                              |
|--------|-----------------------------------------------------------------------------------------------------------------------------------------------|------------------------|------------------------------------------------------------------------------------------------------------------------------------------------------------------------------------------------------------------------------------------------------------------------------------------------------|
| 1      | Organism: CHO cells<br>Supernatant from bioreactor at day 13 of fed batch, media was CD CHO + EfficientFeed B + Vitamin K + 1g/L Pluronic F68 | 1 replicate            | <b>FASP</b> (6 M GdCl, 50 mM Tris pH 8, 10mM DTT, Amicon Ultra 0.5mL Centrifugal Filters 10 kDa cut-off)                                                                                                                                                                                             |
| 2      | Organism: CHO cells<br>Supernatant from bioreactor at day 12 of fed batch, media was CD CHO + EfficientFeed B + Vitamin K + 1g/L Pluronic F68 | 2 technical replicates | <b>FASP</b> (6 M GdCl, 50 mM Tris pH 8, 10mM DTT, Amicon Ultra 0.5mL Centrifugal Filters 30 kDa cut-off)<br><b>SP3</b> (1% SDS, 50 mM Hepes pH 7.4, 10 mM DTT, 1X Roche PICs)<br><b>Precipitation</b> (6 M GdCl, 50 mM Tris pH 8, 10mM DTT)<br><b>S-Trap</b> (5% SDS, 50 mM Tris pH 7.55, 10 mM DTT) |
| 3      | Organism: <i>Saccharomyces cerevisiae</i><br>Whole cell extract                                                                               | 2 technical replicates | <b>SP3</b> (1% SDS, 50 mM Hepes pH 7.4, 10 mM DTT, 1X Roche PICs)<br><b>Precipitation</b> (1% SDS, 50 mM Hepes pH 7.4, 10 mM DTT, 1X Roche PICs)<br><b>S-Trap</b> (5% SDS, 50 mM Tris pH 7.55, 10 mM DTT)                                                                                            |
